# Supplementary material for: Pan-cancer integrated analysis of ANKRD1 expression, prognostic value, and potential implications in cancer
Source: Springer Nature journal article supplement (doi:10.1038/s41598-024-56105-2), 2024-03-04

## Supplemental Information

Table S1. Demographic details in TCGA and GTEx groups

| Abbr | Cancer types                                                     | TCGA (n=10560)     |                   | TCGA+GTEx (n=17152) |                   |
|------|------------------------------------------------------------------|--------------------|-------------------|---------------------|-------------------|
|      |                                                                  | normal*<br>(n=730) | tumor<br>(n=9830) | normal&<br>(n=7322) | tumor<br>(n=9830) |
| ACC  | Adrenocortical carcinoma                                         | -                  | 79                | 128                 | 79                |
| BLCA | Bladder Urothelial Carcinoma                                     | 19                 | 408               | 28                  | 408               |
| BRCA | Breast invasive carcinoma                                        | 113                | 1091              | 292                 | 1091              |
| CESC | Cervical squamous cell carcinoma and endocervical adenocarcinoma | 3                  | 304               | 13                  | 304               |
| CHOL | Cholangiocarcinoma                                               | 9                  | 36                | 9                   | 36                |
| COAD | Colon adenocarcinoma                                             | 41                 | 456               | 349                 | 456               |
| DLBC | Lymphoid Neoplasm Diffuse Large B-cell Lymphoma                  | -                  | 48                | -                   | 48                |
| ESCA | Esophageal carcinoma                                             | 11                 | 161               | 664                 | 161               |
| GBM  | Glioblastoma multiforme                                          | 5                  | 154               | 1157                | 154               |
| HNSC | Head and Neck squamous cell carcinoma                            | 44                 | 500               | 44                  | 500               |
| KICH | Kidney Chromophobe                                               | 24                 | 65                | 52                  | 65                |
| KIRC | Kidney renal clear cell carcinoma                                | 72                 | 530               | 100                 | 530               |
| KIRP | Kidney renal papillary cell carcinoma                            | 32                 | 288               | 60                  | 288               |
| LAML | Acute Myeloid Leukemia                                           | -                  | 151               | 70                  | 151               |
| LGG  | Brain Lower Grade Glioma                                         | -                  | 511               | 1152                | 511               |
| LIHC | Liver hepatocellular carcinoma                                   | 50                 | 371               | 160                 | 371               |
| LUAD | Lung adenocarcinoma                                              | 59                 | 513               | 347                 | 513               |
| LUSC | Lung squamous cell carcinoma                                     | 49                 | 501               | 337                 | 501               |
| MESO | Mesothelioma                                                     | -                  | 86                | -                   | 86                |
| OV   | Ovarian serous cystadenocarcinoma                                | -                  | 374               | 88                  | 374               |
| PAAD | Pancreatic adenocarcinoma                                        | 4                  | 177               | 171                 | 177               |
| PCPG | Pheochromocytoma and Paraganglioma                               | 3                  | 178               | 131                 | 178               |
| PRAD | Prostate adenocarcinoma                                          | 52                 | 495               | 152                 | 495               |
| READ | Rectum adenocarcinoma                                            | 10                 | 166               | 102                 | 166               |
| SARC | Sarcoma                                                          | 2                  | 259               | 2                   | 259               |
| SKCM | Skin Cutaneous Melanoma                                          | 1                  | 103               | 813                 | 103               |
| STAD | Stomach adenocarcinoma                                           | 32                 | 375               | 206                 | 375               |
| TGCT | Testicular Germ Cell Tumors                                      | -                  | 150               | 165                 | 150               |
| THCA | Thyroid carcinoma                                                | 58                 | 502               | 337                 | 502               |
| THYM | Thymoma                                                          | 2                  | 119               | 2                   | 119               |

|      |                                      |    |     |     |     |
|------|--------------------------------------|----|-----|-----|-----|
| UCEC | Uterine Corpus Endometrial Carcinoma | 35 | 543 | 113 | 543 |
| UCS  | Uterine Carcinosarcoma               | -  | 56  | 78  | 56  |
| UVM  | Uveal Melanoma                       | -  | 80  | -   | 80  |

---

Abbr: abbreviation; \* paracancerous tissues; & paracancerous tissues from TCGA database and normal tissues from GTEX database.

Table S2. Gene Set Enrichment Analysis (GSEA) of ANKRD1 in pan-cancer

| cancer type | Ontology | ID         | Description                                                             | set size | ES   | NES  | P value  | FDR      |
|-------------|----------|------------|-------------------------------------------------------------------------|----------|------|------|----------|----------|
| COAD        | BP       | GO:0002683 | negative regulation of immune system process                            | 424      | 0.54 | 1.97 | 1.00E-10 | 2.63E-09 |
| COAD        | BP       | GO:0007159 | leukocyte cell-cell adhesion                                            | 394      | 0.56 | 2.03 | 1.00E-10 | 2.63E-09 |
| COAD        | BP       | GO:0007389 | pattern specification process                                           | 450      | 0.45 | 1.62 | 1.48E-10 | 3.69E-09 |
| COAD        | BP       | GO:0045785 | positive regulation of cell adhesion                                    | 462      | 0.57 | 2.09 | 1.00E-10 | 2.63E-09 |
| COAD        | BP       | GO:0003002 | regionalization                                                         | 351      | 0.46 | 1.65 | 1.77E-09 | 3.47E-08 |
| COAD        | CC       | GO:0062023 | collagen-containing extracellular matrix                                | 419      | 0.64 | 2.34 | 1.00E-10 | 2.63E-09 |
| COAD        | CC       | GO:0009897 | external side of plasma membrane                                        | 433      | 0.61 | 2.21 | 1.00E-10 | 2.63E-09 |
| COAD        | CC       | GO:0005925 | focal adhesion                                                          | 409      | 0.46 | 1.66 | 1.00E-10 | 2.63E-09 |
| COAD        | CC       | GO:0030055 | cell-substrate junction                                                 | 417      | 0.46 | 1.66 | 1.00E-10 | 2.63E-09 |
| COAD        | CC       | GO:0030667 | secretory granule membrane                                              | 298      | 0.53 | 1.90 | 1.00E-10 | 2.63E-09 |
| COAD        | MF       | GO:0140375 | immune receptor activity                                                | 143      | 0.69 | 2.39 | 1.00E-10 | 2.63E-09 |
| COAD        | MF       | GO:0019865 | immunoglobulin binding                                                  | 22       | 0.70 | 1.92 | 0.000126 | 0.000773 |
| COAD        | MF       | GO:0005178 | integrin binding                                                        | 145      | 0.67 | 2.35 | 1.00E-10 | 2.63E-09 |
| COAD        | MF       | GO:0005539 | glycosaminoglycan binding                                               | 219      | 0.58 | 2.08 | 1.00E-10 | 2.63E-09 |
| COAD        | MF       | GO:0038024 | cargo receptor activity                                                 | 78       | 0.62 | 2.02 | 1.86E-08 | 2.93E-07 |
| COAD        | KEGG     | hsa05150   | Staphylococcus aureus infection                                         | 89       | 0.74 | 2.49 | 1.00E-10 | 1.11E-09 |
| COAD        | KEGG     | hsa00532   | Glycosaminoglycan biosynthesis - chondroitin sulfate / dermatan sulfate | 21       | 0.77 | 2.09 | 7.06E-07 | 4.20E-06 |
| COAD        | KEGG     | hsa04145   | Phagosome                                                               | 142      | 0.62 | 2.16 | 1.00E-10 | 1.11E-09 |
| COAD        | KEGG     | hsa05416   | Viral myocarditis                                                       | 64       | 0.71 | 2.32 | 1.00E-10 | 1.11E-09 |
| COAD        | KEGG     | hsa04610   | Complement and coagulation cascades                                     | 85       | 0.68 | 2.26 | 1.00E-10 | 1.11E-09 |
| GBM         | BP       | GO:0043062 | extracellular structure organization                                    | 304      | 0.54 | 2.72 | 1.00E-10 | 2.20E-09 |
| GBM         | BP       | GO:0030198 | extracellular matrix organization                                       | 303      | 0.54 | 2.72 | 1.00E-10 | 2.20E-09 |

|      |      |            |                                                                         |     |      |      |          |          |
|------|------|------------|-------------------------------------------------------------------------|-----|------|------|----------|----------|
| GBM  | BP   | GO:0045229 | external encapsulating structure organization                           | 306 | 0.54 | 2.71 | 1.00E-10 | 2.20E-09 |
| GBM  | BP   | GO:0050900 | leukocyte migration                                                     | 366 | 0.55 | 2.81 | 1.00E-10 | 2.20E-09 |
| GBM  | BP   | GO:0042060 | wound healing                                                           | 417 | 0.50 | 2.59 | 1.00E-10 | 2.20E-09 |
| GBM  | CC   | GO:0062023 | collagen-containing extracellular matrix                                | 421 | 0.56 | 2.90 | 1.00E-10 | 2.20E-09 |
| GBM  | CC   | GO:0098644 | complex of collagen trimers                                             | 22  | 0.71 | 2.24 | 3.92E-05 | 0.00027  |
| GBM  | CC   | GO:0005581 | collagen trimer                                                         | 85  | 0.61 | 2.56 | 1.00E-10 | 2.20E-09 |
| GBM  | CC   | GO:0005788 | endoplasmic reticulum lumen                                             | 299 | 0.54 | 2.73 | 1.00E-10 | 2.20E-09 |
| GBM  | CC   | GO:0005604 | basement membrane                                                       | 97  | 0.52 | 2.26 | 2.09E-08 | 3.07E-07 |
| GBM  | MF   | GO:0005125 | cytokine activity                                                       | 217 | 0.56 | 2.74 | 1.00E-10 | 2.20E-09 |
| GBM  | MF   | GO:0030546 | signaling receptor activator activity                                   | 454 | 0.46 | 2.40 | 1.00E-10 | 2.20E-09 |
| GBM  | MF   | GO:0048018 | receptor ligand activity                                                | 447 | 0.47 | 2.45 | 1.00E-10 | 2.20E-09 |
| GBM  | MF   | GO:0030020 | extracellular matrix structural constituent conferring tensile strength | 41  | 0.65 | 2.38 | 2.67E-07 | 3.12E-06 |
| GBM  | MF   | GO:0005126 | cytokine receptor binding                                               | 243 | 0.55 | 2.72 | 1.00E-10 | 2.20E-09 |
| GBM  | KEGG | hsa04668   | TNF signaling pathway                                                   | 110 | 0.64 | 2.82 | 1.00E-10 | 1.78E-09 |
| GBM  | KEGG | hsa04657   | IL-17 signaling pathway                                                 | 91  | 0.65 | 2.77 | 1.00E-10 | 1.78E-09 |
| GBM  | KEGG | hsa04060   | Cytokine-cytokine receptor interaction                                  | 279 | 0.58 | 2.88 | 1.00E-10 | 1.78E-09 |
| GBM  | KEGG | hsa05323   | Rheumatoid arthritis                                                    | 85  | 0.66 | 2.81 | 1.00E-10 | 1.78E-09 |
| GBM  | KEGG | hsa04610   | Complement and coagulation cascades                                     | 85  | 0.62 | 2.61 | 1.00E-10 | 1.78E-09 |
| HNSC | BP   | GO:0003012 | muscle system process                                                   | 426 | 0.76 | 2.71 | 1.00E-10 | 2.55E-09 |
| HNSC | BP   | GO:0006936 | muscle contraction                                                      | 333 | 0.78 | 2.77 | 1.00E-10 | 2.55E-09 |
| HNSC | BP   | GO:0055001 | muscle cell development                                                 | 181 | 0.81 | 2.79 | 1.00E-10 | 2.55E-09 |
| HNSC | BP   | GO:0051146 | striated muscle cell differentiation                                    | 275 | 0.76 | 2.67 | 1.00E-10 | 2.55E-09 |
| HNSC | BP   | GO:0042692 | muscle cell differentiation                                             | 379 | 0.75 | 2.63 | 1.00E-10 | 2.55E-09 |
| HNSC | CC   | GO:0030016 | myofibril                                                               | 229 | 0.86 | 2.97 | 1.00E-10 | 2.55E-09 |
| HNSC | CC   | GO:0043292 | contractile fiber                                                       | 237 | 0.85 | 2.96 | 1.00E-10 | 2.55E-09 |

|      |      |            |                                                 |     |      |      |          |          |
|------|------|------------|-------------------------------------------------|-----|------|------|----------|----------|
| HNSC | CC   | GO:0030017 | sarcomere                                       | 210 | 0.86 | 2.97 | 1.00E-10 | 2.55E-09 |
| HNSC | CC   | GO:0031674 | I band                                          | 141 | 0.86 | 2.90 | 1.00E-10 | 2.55E-09 |
| HNSC | CC   | GO:0030018 | Z disc                                          | 129 | 0.85 | 2.86 | 1.00E-10 | 2.55E-09 |
| HNSC | MF   | GO:0003779 | actin binding                                   | 422 | 0.72 | 2.54 | 1.00E-10 | 2.55E-09 |
| HNSC | MF   | GO:0008307 | structural constituent of muscle                | 41  | 0.89 | 2.58 | 1.00E-10 | 2.55E-09 |
| HNSC | MF   | GO:0051015 | actin filament binding                          | 209 | 0.73 | 2.52 | 1.00E-10 | 2.55E-09 |
| HNSC | MF   | GO:0005523 | tropomyosin binding                             | 16  | 0.95 | 2.28 | 1.00E-10 | 2.55E-09 |
| HNSC | MF   | GO:0005516 | calmodulin binding                              | 196 | 0.62 | 2.13 | 1.00E-10 | 2.55E-09 |
| HNSC | KEGG | hsa05414   | Dilated cardiomyopathy                          | 101 | 0.82 | 2.68 | 1.00E-10 | 1.69E-09 |
| HNSC | KEGG | hsa04261   | Adrenergic signaling in cardiomyocytes          | 152 | 0.73 | 2.46 | 1.00E-10 | 1.69E-09 |
| HNSC | KEGG | hsa04260   | Cardiac muscle contraction                      | 81  | 0.76 | 2.44 | 1.00E-10 | 1.69E-09 |
| HNSC | KEGG | hsa05410   | Hypertrophic cardiomyopathy                     | 95  | 0.83 | 2.68 | 1.00E-10 | 1.69E-09 |
| HNSC | KEGG | hsa05412   | Arrhythmogenic right ventricular cardiomyopathy | 83  | 0.80 | 2.54 | 1.00E-10 | 1.69E-09 |
| LUSC | BP   | GO:0043129 | surfactant homeostasis                          | 14  | 0.81 | 1.84 | 0.000132 | 0.000764 |
| LUSC | BP   | GO:0048762 | mesenchymal cell differentiation                | 246 | 0.47 | 1.55 | 1.36E-05 | 0.000105 |
| LUSC | BP   | GO:0006959 | humoral immune response                         | 287 | 0.58 | 1.91 | 1.00E-10 | 2.49E-09 |
| LUSC | BP   | GO:0006957 | complement activation, alternative pathway      | 17  | 0.78 | 1.88 | 6.06E-05 | 0.000389 |
| LUSC | BP   | GO:0048875 | chemical homeostasis within a tissue            | 16  | 0.79 | 1.86 | 8.68E-05 | 0.000537 |
| LUSC | CC   | GO:0042599 | lamellar body                                   | 17  | 0.80 | 1.91 | 2.37E-05 | 0.000173 |
| LUSC | CC   | GO:0005771 | multivesicular body                             | 62  | 0.66 | 1.94 | 2.03E-07 | 2.49E-06 |
| LUSC | CC   | GO:0030139 | endocytic vesicle                               | 331 | 0.63 | 2.09 | 1.00E-10 | 2.49E-09 |
| LUSC | CC   | GO:0045334 | clathrin-coated endocytic vesicle               | 86  | 0.65 | 2.00 | 1.70E-09 | 3.17E-08 |
| LUSC | CC   | GO:0030136 | clathrin-coated vesicle                         | 202 | 0.52 | 1.70 | 2.08E-07 | 2.54E-06 |
| LUSC | MF   | GO:0038024 | cargo receptor activity                         | 78  | 0.67 | 2.04 | 2.64E-10 | 6.05E-09 |
| LUSC | MF   | GO:0005044 | scavenger receptor activity                     | 45  | 0.73 | 2.06 | 1.65E-08 | 2.55E-07 |

|      |      |            |                                                                        |     |      |      |          |          |
|------|------|------------|------------------------------------------------------------------------|-----|------|------|----------|----------|
| LUSC | MF   | GO:0140375 | immune receptor activity                                               | 143 | 0.75 | 2.41 | 1.00E-10 | 2.49E-09 |
| LUSC | MF   | GO:0030246 | carbohydrate binding                                                   | 258 | 0.58 | 1.92 | 1.00E-10 | 2.49E-09 |
| LUSC | MF   | GO:0019199 | transmembrane receptor protein kinase activity                         | 77  | 0.51 | 1.55 | 0.00232  | 0.008471 |
| LUSC | KEGG | hsa04610   | Complement and coagulation cascades                                    | 85  | 0.74 | 2.27 | 1.00E-10 | 1.18E-09 |
| STAD | BP   | GO:0007608 | sensory perception of smell                                            | 406 | 0.58 | 2.05 | 1.00E-10 | 5.80E-08 |
| STAD | BP   | GO:0051918 | negative regulation of fibrinolysis                                    | 13  | 0.76 | 1.94 | 6.41E-05 | 0.002463 |
| STAD | BP   | GO:0050911 | detection of chemical stimulus involved in sensory perception of smell | 382 | 0.59 | 2.07 | 1.00E-10 | 5.80E-08 |
| STAD | KEGG | hsa04610   | Complement and coagulation cascades                                    | 85  | 0.46 | 1.51 | 0.000354 | 0.002207 |
| STAD | KEGG | hsa04740   | Olfactory transduction                                                 | 395 | 0.57 | 2.01 | 1.00E-10 | 4.05E-09 |

COAD, Colon adenocarcinoma; GBM, Glioblastoma multiforme; HNSC, Head and Neck squamous cell carcinoma; LUSC, Lung squamous cell carcinoma; STAD, Stomach adenocarcinoma; BP, biological process; CC, cellular component; MF, molecular function; ES, Enrichment score.

Figure S1.

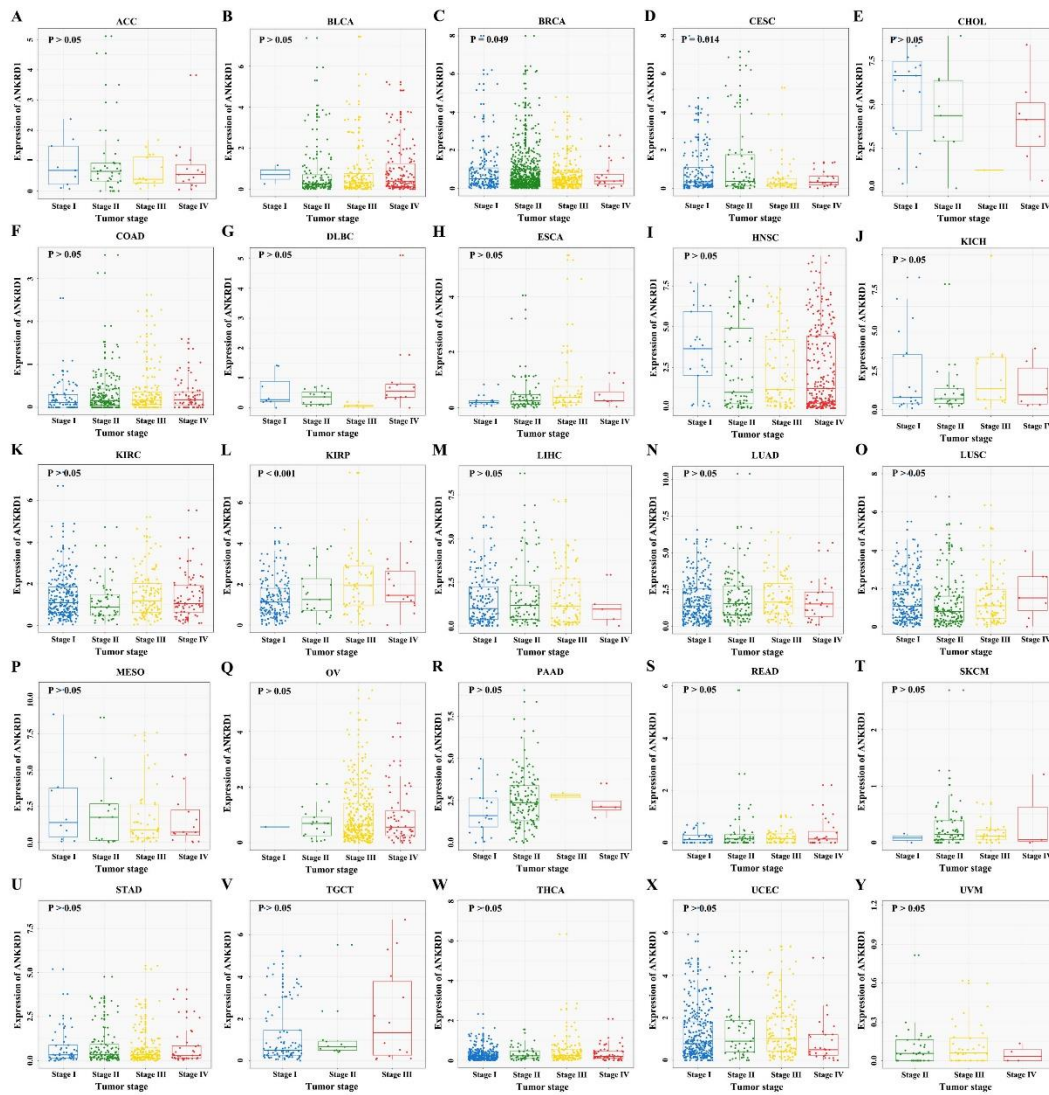

Figure S1. ANKRD1 expression levels in tumor stages of pan-cancer.

Figure S2.

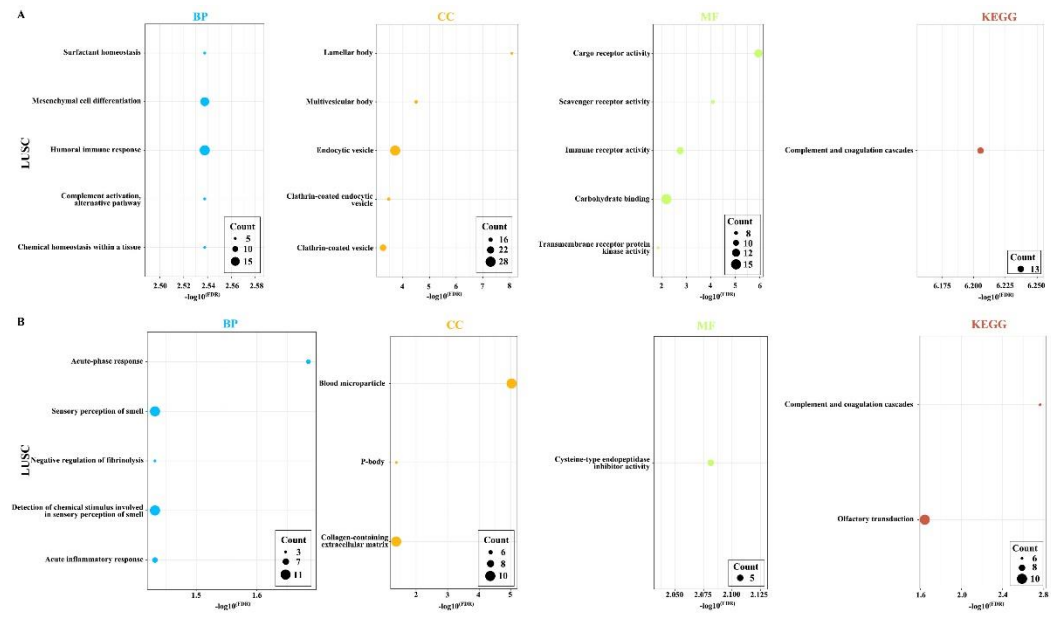

Figure S2. GO and KEGG enrichment analyses for ANKRD1. Top 5 pathways enriched in the BP, CC, MF, and KEGG analyses in (A) LUSC, and (B) STAD.

Figure S3.

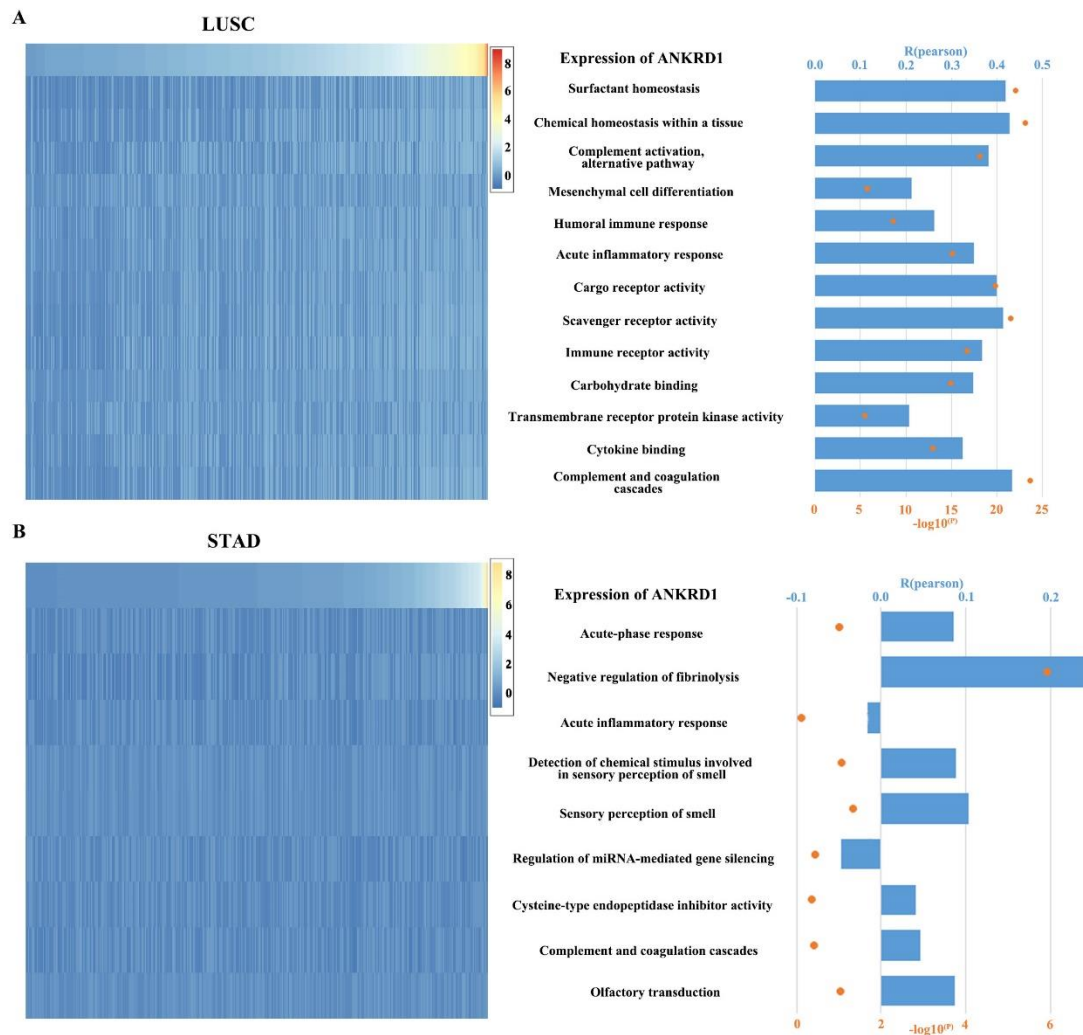

Figure S3. Correlation analysis between ANKRD1 expression and the enrichment scores of enriched pathways based on the BP, MF, and KEGG analyses in (A) LUSC, and (B) STAD. The heatmap showed ANKRD1 mRNA expression and the enrichment scores of each patient in the TCGA database. The samples were arranged in ascending order of the expression of ANKRD1. The column graph and line graph on the right showed the R-value and P-value of the correlation analysis.

Figure S4 WB original data

Figure 13B Caco2

$\beta$ -tublin

Control ANKRD1 KO

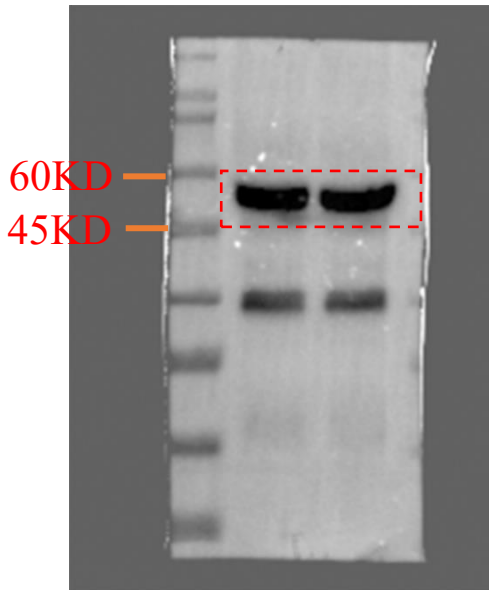

ANKRD1

Control ANKRD1 KO

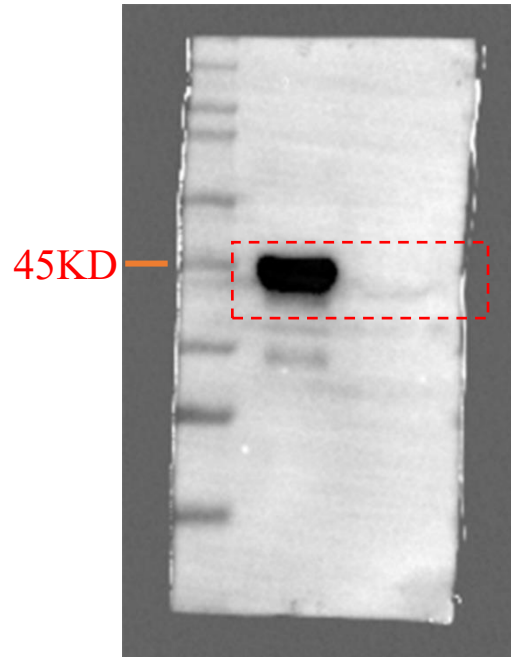

cleared Caspase 3

Control ANKRD1 KO

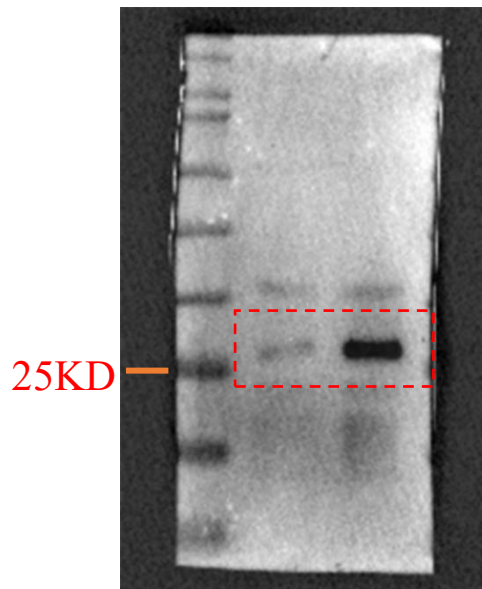

Bax

Control ANKRD1 KO

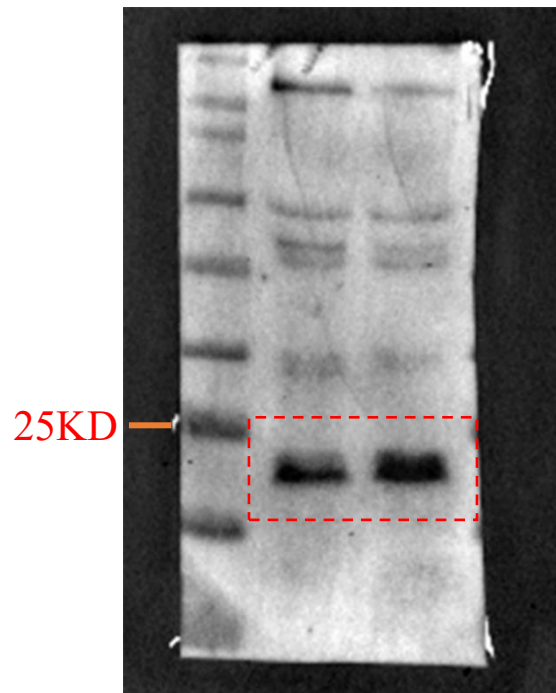

Figure 13C SW480

$\beta$ -tubulin

ANKRD1

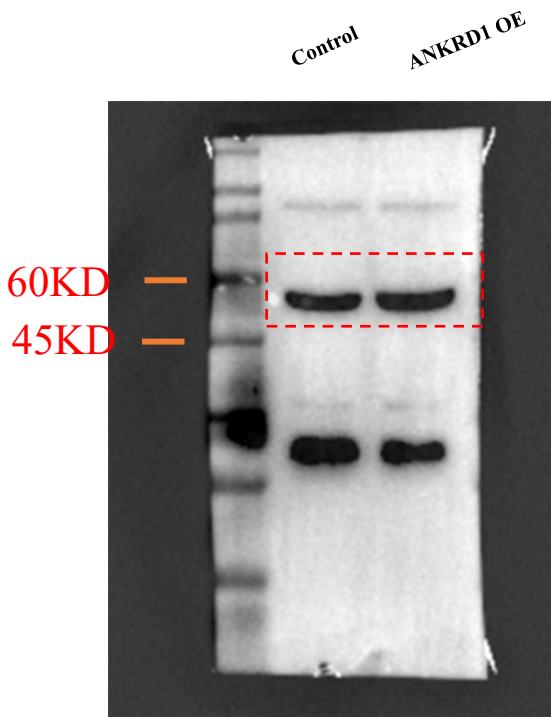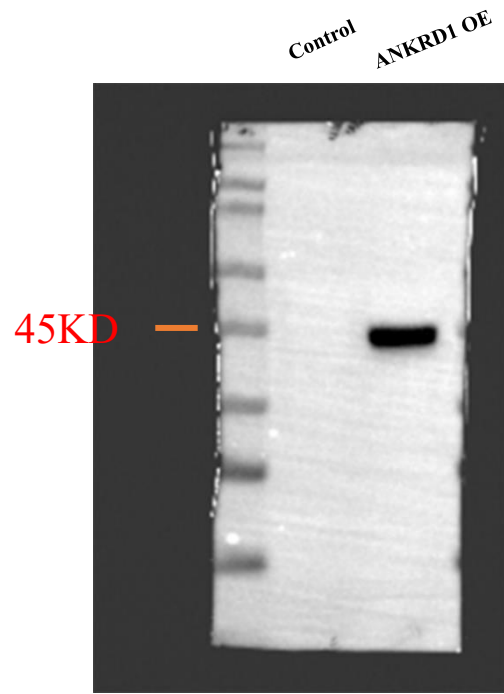

cleared Caspase 3

Bax

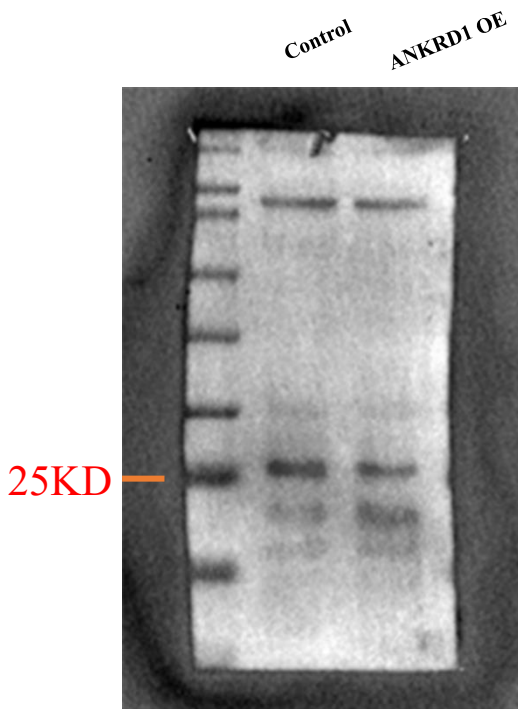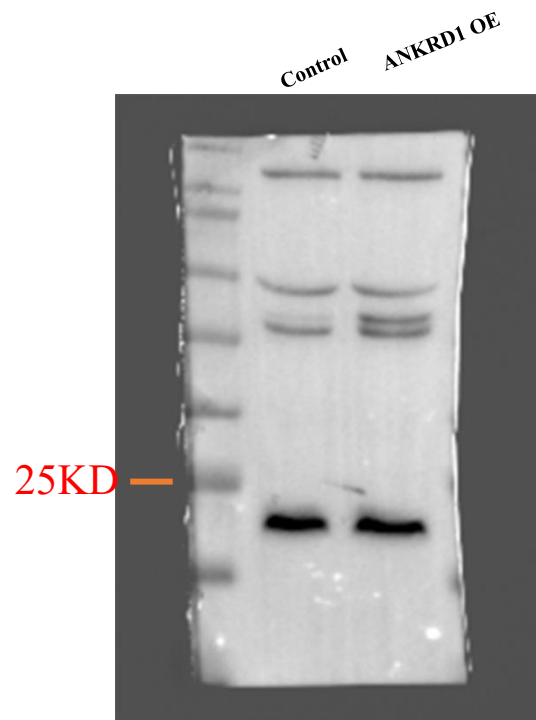

Supplement: MOESM1 [file 41598_2024_56105_MOESM1_ESM.pdf]
